# Supplementary material
Source: publisher figshare collection journal article supplement (https://tandf.figshare.com/ndownloader/files/13005161)

**The Supplementary file showed the variation of CAC, and with temperature (288.15K -308.15K)**

Fig. 3;(a) represents the variation of CAC with temperature, (b) represents the variation of with temperature, (c) represents the variation of with temperature, and (d) represents the variation of with temperature.


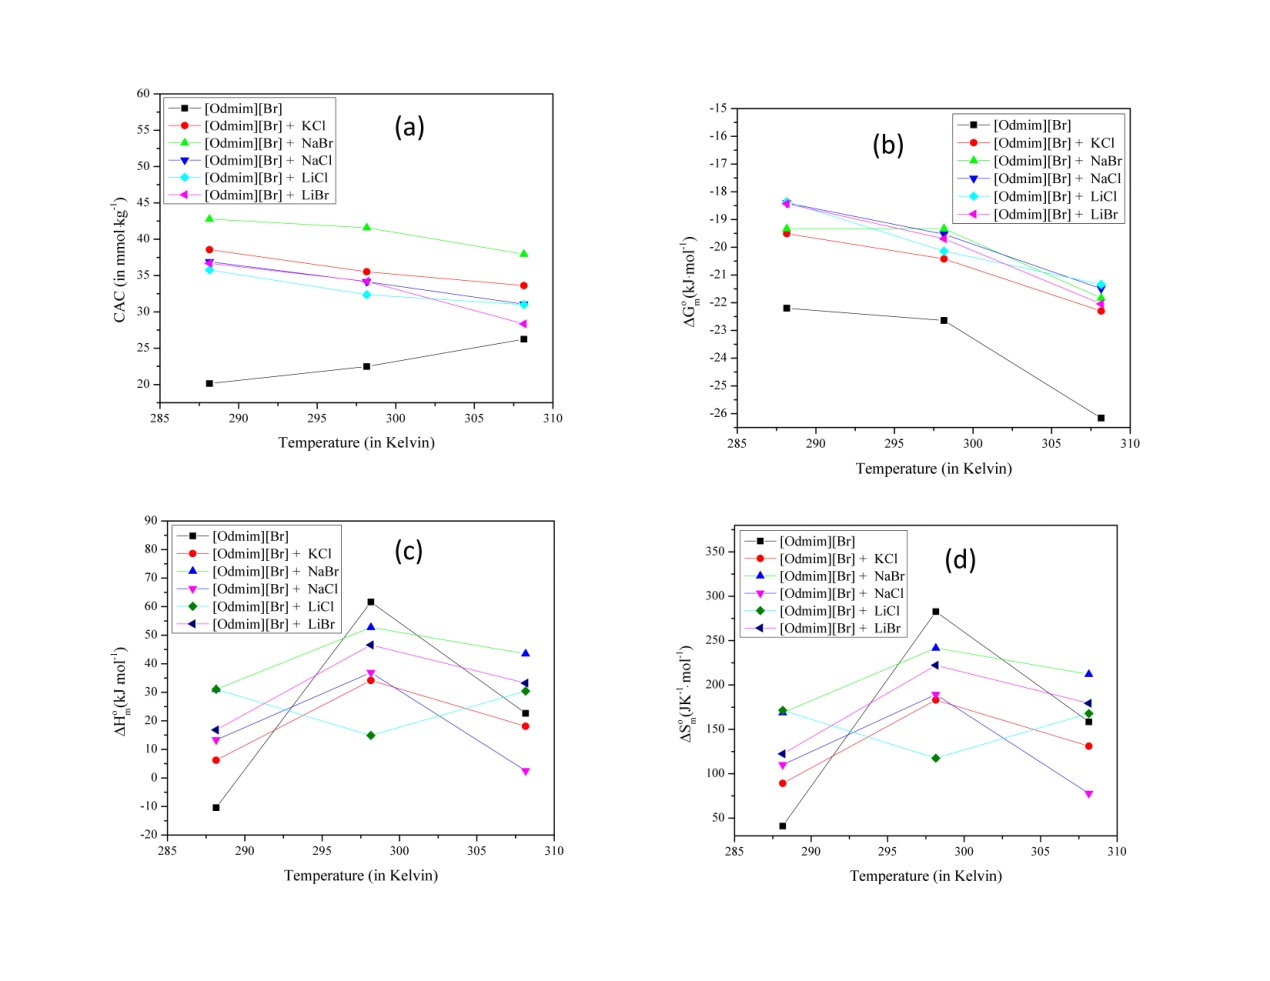

Supplement: Supplementary file 1 [file 13005161]
